# Supplementary material for: Association between <em>IL11RA</em> Overexpression and the Initiation of Melanoma Liver Metastasis
Source: Preprints.org preprint supplement (doi:10.20944/preprints202304.0650.v1), 2023-04-20
Supplement: Supplementary file 1 [file Koroknai_etal_Supplementary Table 1.docx]

| **Supplementary Table 1. Results of in vitro invasion assays** | | | | | | |
| --- | --- | --- | --- | --- | --- | --- |
|  | WM983A | WM278 | WM3248 | WM793B | WM1361 | WM1366 |
| Controla 1 | 4.3 | 321 | 1.0 | 312 | 12.7 | 384 |
| Control 2 | 7.9 | 314 | 8.5 | 301 | 18.8 | 365 |
| Control 3 | 5 | 99 | 1.3 | 320 | 36 | 372 |
| HHSEC-CMb 1 | 9.4 | 301 | 7.3 | 314 | 20.8 | 352 |
| HHSEC-CM 2 | 11.3 | 325 | 27.0 | 305 | 35.1 | 368 |
| HHSEC-CM 3 | 9.1 | 114 | 6.9 | 339 | 63 | 367 |
| Ratioc 1 | 2.2 | 0.9 | 7.3 | 1.0 | 1.6 | 0.9 |
| Ratio 2 | 1.4 | 1.0 | 3.2 | 1.0 | 1.9 | 1.0 |
| Ratio 3 | 1.8 | 1.2 | 5.3 | 1.1 | 1.8 | 1.0 |
| Mean ratio | 1.8 | 1.0 | 5.3 | 1.0 | 1.8 | 1.0 |
| S.D. ratio | 0.4 | 0.1 | 2.1 | 0.0 | 0.1 | 0.0 |
| aAverage number of invaded cells with 10% FBS as chemoattractant, bAverage number of invaded cell with HHSEC conditioned medium (50%) as chemoattractant. cRatio of the HHSEC-CM and Control results, numbers indicate the same experiments. | | | | | | |
