# Supplementary material for: Association between <em>IL11RA</em> Overexpression and the Initiation of Melanoma Liver Metastasis
Source: Preprints.org preprint supplement (doi:10.20944/preprints202304.0650.v1), 2023-04-20
Supplement: Supplementary file 2 [file Koroknai_etal_Supplementary Table 3.docx]

| **Supplementary Table 2. Correlation between the relative gene expression of cytokine- and chemokine receptors and the invasive potential in melanoma cells after culturing with HHSEC-CM.** | | |
| --- | --- | --- |
| Gene symbol | Correlation Coefficient | Sig. (2-tailed) |
| CCR1 | .899* | 0.015 |
| CXC3CR1 | .896* | 0.016 |
| CXCR2 | .870* | 0.024 |
| CXCR5 | .877* | 0.022 |
| IL1RAPL2 | .963** | 0.002 |
| IL1RN | .928** | 0.008 |
| IL6ST | .919** | 0.010 |
| IL15RA | .933** | 0.007 |
| IL17RB | .967** | 0.002 |
| IL17RC | .872* | 0.024 |
| IL17RD | .938** | 0.006 |
| TNFRSF10B | .918** | 0.010 |
| TNFRSF18 | .925** | 0.008 |
| * Correlation is significant at the 0.05 level (2-tailed). | | |
| ** Correlation is significant at the 0.01 level (2-tailed). | | |
