# Supplementary material for: Association between <em>IL11RA</em> Overexpression and the Initiation of Melanoma Liver Metastasis
Source: Preprints.org preprint supplement (doi:10.20944/preprints202304.0650.v1), 2023-04-20
Supplement: Supplementary file 3 [file Koroknai_etal_Supplementary Table_2.xlsx]

## Sheet: Munka1
Supplementary Table 2. Relative expression level of chemokine and cytokine receptors. Data are presented as mean 2^-∆Ct of three independent experiments.
	WM1366-HINV	WM1366-HNON-INV	WM3248-HINV	WM3248-HNON-INV	WM278-HINV	WM278-HNON-INV	WM793B-HINV	WM793B-HNON-INV	WM983A-HINV	WM983A-HNON-INV	WM1361-HINV	WM1361-HNON-INV
Gene symbol	mean 2^-∆Ct	mean 2^-∆Ct	mean 2^-∆Ct	mean 2^-∆Ct	mean 2^-∆Ct	mean 2^-∆Ct	mean 2^-∆Ct	mean 2^-∆Ct	mean 2^-∆Ct	mean 2^-∆Ct	mean 2^-∆Ct	mean 2^-∆Ct
CCR1	1.20685e-05	1.52633e-06	0.000572799	9.23305e-06	9.36666e-05	6.60482e-05	4.88895e-05	4.511e-05	0.000306084	0.000238406	2.17468e-06	7.26895e-07
CCR2	1.61143e-05	0.0156037	3.40041e-05	1.12246e-05	1.03859e-05	5.82897e-05	6.21499e-06	2.82678e-06	0.0149842	2.36239e-06	9.6855e-06	9.02164e-06
CCR3	2.69009e-05	2.72425e-05	0.00022967	0.000113164	8.47199e-05	5.26475e-05	0.000104215	6.44792e-05	0.000152814	0.000250087	0.000231767	0.000260546
CCR4	6.78813e-05	6.99004e-05	0.000135885	0.00116528	6.97097e-05	9.39715e-05	8.1221e-05	7.21807e-05	0.000152443	9.13146e-05	0.000342369	0.000306465
CCR5	0.000277398	6.70867e-06	4.96706e-05	7.5148e-06	0.000107944	3.68323e-05	4.24743e-06	1.86454e-05	7.24864e-05	2.10755e-06	1.47695e-05	0.000380591
CCR6	7.4665e-06	1.27365e-05	5.83595e-05	6.39929e-05	3.50336e-05	4.3992e-05	4.2308e-05	0.000209252	4.5609e-05	3.21209e-05	2.98277e-05	3.55411e-05
CCR7	0.000152323	4.19849e-05	0.000366725	0.000203399	0.000130495	0.000211609	0.000129708	0.000142717	0.000166259	0.000124658	5.68437e-05	7.64711e-05
CCR8	0.00173593	0.000283313	0.00204732	0.00133682	0.00136394	0.00172998	0.00107622	0.00119292	0.00167873	0.00113527	0.00149627	0.00166583
CCR9	0.00071212	0.000723328	0.00090616	0.000725069	0.000451109	0.000597673	0.00104806	0.00098923	0.00132164	0.000940384	0.000586069	0.00125188
CCR10	0.000173985	0.000159527	0.0007546	0.000504313	0.000187505	0.000202661	0.000133948	0.000498881	7.9084e-05	3.74903e-05	1.83105e-05	2.71857e-05
CCRL1	0.00255325	0.00231699	0.00296799	0.0025097	0.00220806	0.0183325	0.00410552	0.00438535	0.00234447	0.000891433	0.00394213	0.00505469
CXC3CR1	3.57693e-06	7.00916e-06	6.89139e-05	4.2389e-05	2.58399e-05	6.90642e-05	2.95793e-05	4.48235e-05	2.52555e-05	2.7897e-05	6.85571e-06	1.75589e-05
CXCR1	5.57973e-07	1.08984e-06	4.91937e-06	4.28479e-07	2.8492e-06	1.54292e-05	3.29281e-05	4.35829e-06	1.41786e-05	2.96748e-07	3.80341e-06	1.0131e-06
CXCR2	4.86538e-05	3.22704e-05	0.00065936	0.000191263	0.000170104	0.000178556	0.00019485	0.000253067	0.000124608	0.00015783	5.02051e-05	3.05664e-05
CXCR3	1.04977e-05	2.1596e-05	7.45664e-05	0.000118248	3.16251e-05	3.32264e-05	5.04608e-05	3.50719e-05	2.71073e-05	1.60029e-05	1.56815e-05	5.79675e-06
CXCR4	0.00674539	2.32925e-05	0.00468192	0.00409974	3.67406e-06	5.05397e-06	5.89889e-05	6.64293e-06	8.48068e-05	3.79052e-06	3.79394e-06	0.000447391
CXCR5	2.03822e-06	2.50329e-06	0.000684982	4.48911e-06	1.20127e-05	3.24698e-05	0.000328863	1.26401e-05	5.33984e-06	0.000154966	2.59378e-05	0.000716499
CXCR6	0.00103803	0.000410526	0.00164299	0.00120213	0.000412781	0.00127933	0.00259779	0.000401097	0.00110219	0.00219702	0.00244395	0.00301672
CXCR7	0.00157332	1.85094e-06	0.0004345	1.69974e-05	1.44295e-05	1.69414e-05	1.16134e-05	1.5518e-05	1.70698e-05	8.8574e-06	3.87966e-06	1.32819e-05
XCR1	1.86524e-06	0.000168135	9.01668e-06	1.48237e-05	7.5751e-06	1.66751e-05	9.5193e-06	2.31014e-05	7.33779e-06	2.34646e-06	3.87342e-06	5.27361e-06
IL1R1	0.0309645	0.000495454	0.00469183	0.00268117	0.00482529	0.00392861	0.0186645	0.00760896	0.00087412	0.000375195	0.000291539	0.000268281
IL1R2	3.52761e-05	8.61409e-06	0.00126078	0.00124475	8.00841e-05	8.49567e-05	4.19813e-05	3.63936e-05	2.72132e-05	2.65136e-05	7.80744e-06	8.71128e-06
IL1RAP	0.00220939	0.00365766	0.0159234	0.011262	0.0145157	0.0121521	0.00724708	0.00508789	0.00802974	0.00468312	0.0106466	0.00655948
IL1RAPL2	1.51307e-05	2.53402e-05	3.79377e-05	1.60843e-05	5.85795e-05	8.33083e-05	1.66014e-05	2.62426e-05	5.93307e-06	5.09952e-06	5.10269e-05	7.25347e-05
IL1RL1	3.29508e-06	2.30051e-05	0.000161439	1.45723e-06	2.11246e-05	1.5337e-05	0.000140985	0.00429039	0.000743686	8.60707e-06	0.00132564	1.97109e-06
IL1RL2	1.07839e-05	1.02194e-05	5.00714e-07	8.6311e-07	2.66882e-06	0.0170774	0.00366879	3.74112e-06	0.000320341	1.63352e-06	0.00344999	0.00114268
IL1RN	4.48779e-07	3.48329e-05	0.000615011	3.66747e-07	1.16528e-05	0.00016966	1.75457e-06	2.39536e-05	0.00268631	3.89744e-05	0.000850759	0.00036673
IL2RA	2.95721e-05	2.06444e-06	2.51389e-05	4.69799e-05	1.09839e-05	0.00175007	3.46038e-05	0.00112639	5.71267e-05	0.001391	2.73878e-07	0.000131548
IL2RB	0.000190072	0.000117052	0.00440767	0.00273535	0.00148167	0.00137156	0.00119344	0.000748995	0.00154211	0.000799397	0.000199714	0.00019789
IL2RG	0.00199224	4.25309e-07	0.00241778	0.00158501	6.93542e-06	1.42766e-05	1.4392e-06	1.02361e-06	3.13066e-05	4.51966e-06	7.51513e-05	5.59357e-05
IL3RA	0.0148636	0.000138321	7.74455e-05	8.38648e-07	1.00487e-06	0.0018172	0.000188265	0.00510637	0.000736222	1.54993e-06	0.00126598	7.0209e-05
IL4R	0.0119775	0.00215089	0.00349578	0.00289431	0.000992275	0.000949886	0.00110238	0.00047308	0.00123829	0.000795904	0.0191163	0.0186329
IL5RA	4.35712e-07	0.000776872	1.7148e-05	6.72054e-06	4.42967e-06	1.92698e-06	2.83111e-06	1.38763e-05	4.19373e-05	0.000226566	4.42244e-06	5.66025e-07
IL6R	0.000440651	0.000457216	0.00308451	0.00220431	0.00126704	0.00182601	0.0035625	0.00215596	0.00663122	0.01731	0.0079538	0.00638716
IL6ST	9.12538e-06	2.70241e-06	0.0178576	4.31229e-05	0.0035796	0.00569839	0.00399919	0.00432425	0.00238871	0.00185803	1.99145e-05	4.45762e-06
IL7R	0.0143613	0.0338425	0.00756566	0.00836289	0.0063724	0.00199819	0.0107671	0.00152417	0.00696076	0.00322395	0.011715	0.0072576
IL8RA	1.51804e-06	0.0156024	1.01526e-05	2.50121e-06	3.60809e-06	3.35116e-06	0.00151089	3.47178e-06	4.69412e-06	5.2792e-07	6.1118e-06	1.00881e-06
IL8RB	7.76606e-06	1.55225e-06	0.000209592	6.46093e-05	9.66341e-06	0.00110433	5.3579e-05	2.4848e-07	1.24043e-05	8.04678e-07	1.39324e-05	3.792e-06
IL9R	1.00774e-05	1.5781e-05	9.5941e-06	8.19964e-06	1.16173e-05	9.2525e-06	1.02213e-05	8.4101e-06	5.09117e-05	1.77054e-05	4.72762e-06	4.28342e-06
IL10RA	0.000109927	2.81757e-05	0.000617576	0.000452932	6.36123e-05	6.65122e-05	9.04875e-05	7.88326e-05	6.79678e-05	6.20814e-05	5.19678e-05	6.09958e-05
IL10RB	0.000789889	0.00824479	0.00489124	0.001657	0.00054755	0.000686989	0.00165607	0.00186571	0.00107893	0.000620278	0.000761619	0.000225656
IL11RA	0.000173375	7.0268e-06	0.00840555	4.83822e-05	0.000113234	9.1911e-05	0.000287412	6.91531e-05	0.0132145	2.47118e-05	0.00546306	1.70284e-05
IL12RB1	8.05486e-05	0.000121028	0.000303314	7.81947e-05	7.57375e-05	8.51759e-05	3.10214e-05	3.61303e-05	7.36469e-05	1.7082e-05	0.000179734	0.000127905
IL12RB2	0.00119236	0.000243855	0.00080546	0.000304132	1.39713e-05	0.000203425	4.51112e-05	5.64446e-06	0.00159606	0.00153448	2.15775e-06	7.04277e-06
IL13RA1	0.00086095	0.000163338	0.0198331	0.00318374	0.0113878	0.017023	0.0223214	0.0992353	0.0093141	0.00867578	0.00180099	0.00162371
IL13RA2	0.000107923	2.32299e-05	0.000637504	0.00116247	0.222594	0.223293	0.00102792	0.000906467	7.58239e-05	7.65465e-05	0.0527092	0.0272288
IL15RA	0.000287167	0.000150275	0.00135321	5.96665e-05	0.000264789	0.000365681	0.000199101	0.000136493	0.000151862	4.45469e-05	0.000158623	0.00015008
IL17RA	0.00573801	0.000925078	0.00644349	0.00324406	0.00240661	0.00177388	0.0105797	0.00492004	0.00429503	0.00473438	0.00487649	0.00268583
IL17RB	3.91789e-05	5.41194e-06	0.000347514	7.11577e-06	0.000204766	0.000323456	0.000201669	0.000140605	0.00303384	0.000124585	0.00622693	0.000576364
IL17RC	0.000445758	0.000161954	0.000908569	0.000161588	0.00136316	0.0013112	0.000919681	0.00114346	0.00193121	0.000482781	0.000547051	0.000249247
IL17RD	8.19309e-07	1.93128e-07	0.00857083	1.10288e-05	0.00157983	0.0637696	0.00577663	0.0022544	5.29869e-05	4.43053e-05	0.000158035	1.57125e-06
IL17RE	0.000255524	5.91724e-05	5.29468e-05	5.87838e-05	0.000108715	0.000467669	5.1775e-05	4.74051e-05	5.3996e-05	4.95885e-05	2.54243e-05	1.96286e-05
IL18R1	0.000194875	9.30512e-05	0.00734155	0.003394	0.0057847	0.00415899	0.00257859	0.000855874	0.000383394	0.000551072	1.88905e-05	2.1818e-06
IL18RAP	0.000338406	0.000178955	0.000968552	0.000313777	0.000702644	0.00124554	0.00147852	0.00111517	0.0015962	0.000279162	0.000156043	0.000211453
IL20RA	0.000497436	0.000162492	0.000112749	0.00105934	0.000115056	6.48901e-07	0.0499941	3.57646e-06	2.38706e-05	3.04751e-07	1.37903e-06	0.00150085
IL20RB	0.000988512	0.00110354	0.00690882	0.00350666	0.00213679	0.000197223	0.000552803	0.000125948	3.89776e-05	9.5773e-05	0.000444454	0.000246126
IL21R	5.43454e-05	0.000795951	0.000300107	0.00158745	0.000183564	0.00324261	7.30175e-05	6.36801e-06	0.0113804	4.48864e-06	0.00317888	6.24566e-06
IL22RA1	8.24758e-05	8.1445e-05	0.00265929	0.00200797	0.000670009	0.0013326	0.000206117	0.000276741	0.000549469	0.00040597	0.000170217	0.000272037
IL22RA2	6.12435e-05	8.37477e-05	6.82992e-05	4.09096e-05	3.14582e-05	4.50626e-05	2.58502e-05	1.82662e-05	5.21498e-05	1.52551e-05	6.73503e-06	1.38108e-05
IL23R	2.60026	1.16152	3.84606	4.17462	1.68757	2.07629	2.03105	1.76582	1.7281	1.25135	2.35269	2.6229
IL27RA	0.00849323	0.00993394	0.00869866	0.00910879	0.00638812	0.0103598	0.0184572	0.0167248	0.00913897	0.00691432	0.0453445	0.0402205
IL28RA	0.0232105	0.000429366	0.00313729	0.00223582	0.0015556	6.40875e-06	5.36483e-05	4.78215e-05	0.000490033	0.000135654	0.000180785	0.000312575
IL31RA	0.00336112	0.00562409	0.00269802	0.00396857	0.000617907	0.000326894	0.00371681	0.000945735	8.923e-05	0.000101287	0.00111685	0.000699652
CD40	0.00147733	6.81972e-06	0.00466185	0.00379322	0.000618907	0.000991835	4.92093e-05	1.42851e-05	8.25676e-05	6.98134e-05	0.000505626	0.000635526
FAS	0.00207268	0.00104202	0.014674	0.0100463	0.0130713	0.0131814	0.02395	0.0189781	0.0132846	0.00751768	0.00924925	0.00896268
LTBR	0.0361404	0.0196043	0.0750524	0.0596611	0.0517311	0.0556731	0.0444132	0.0313837	0.0145146	0.0234431	0.074319	0.0622335
NGFR	0.000660426	2.55793e-05	0.2171	0.193221	0.00106062	0.0009643	0.0255056	0.017895	0.313909	0.0468262	0.0145818	0.0157532
TNFRSF1A	0.00551267	0.000347549	0.00273003	0.00252669	0.00151984	0.00264762	0.00140953	0.00137175	0.000768481	0.00055731	0.0187587	0.0110242
TNFRSF1B	0.00503156	0.000883022	0.00608165	0.00525803	0.00229989	0.00363953	0.00254981	0.0023421	0.00174636	0.00112131	0.0272227	0.0197581
TNFRSF4	2.33693e-05	7.99491e-06	0.000136468	7.3644e-06	0.000122485	3.19089e-07	1.3056e-05	1.21131e-05	8.92044e-06	0.000304704	1.82942e-06	1.20277e-06
TNFRSF7	0.000108274	0.000111809	0.00114677	0.000374798	0.000704848	0.00186797	0.000146802	0.000148948	0.00012571	4.4866e-05	0.000190477	0.000297404
TNFRSF8	1.24757e-05	1.61681e-05	0.000371931	0.00107489	1.3885e-05	1.50372e-05	2.74248e-05	3.96668e-05	2.2508e-05	1.79781e-05	0.000429445	0.000537669
TNFRSF9	0.000182131	2.7796e-05	0.000144346	0.00161638	0.000420418	0.00746424	2.87538e-05	1.00478e-06	2.09611e-05	0.000140145	0.000203892	0.000139713
TNFRSF10A	0.0433515	0.0207817	0.0587026	0.0310883	0.0556561	0.0538295	0.0504746	0.035121	0.0221898	0.00543291	0.0590155	0.0384336
TNFRSF10B	0.00247955	0.00259525	0.0643598	0.000921198	0.0446185	0.0424982	0.04146	0.0297338	0.0217019	0.0223806	0.00369541	0.00258319
TNFRSF10C	0.00234781	0.000483831	0.00114251	0.000329407	0.000133584	0.000193458	0.000534821	0.000520383	6.09172e-05	9.95325e-05	5.97164e-05	3.0961e-05
TNFRSF10D	4.52268e-05	0.000256576	0.00356124	0.000752679	1.38287e-06	1.17396e-05	0.000327895	2.30063e-05	0.000213717	0.00962836	0.000337272	0.00761352
TNFRSF11A	0.000221918	0.000144826	0.00311227	0.00189913	0.00348461	0.00201223	0.00831649	0.00713125	3.71962e-05	3.61639e-05	0.000755911	0.00117663
TNFRSF11B	0.00815089	0.0133479	0.0125871	0.0148719	0.00330676	0.00273021	0.0511774	0.022086	9.56149e-05	1.4742e-05	0.00262492	0.00149286
TNFRSF12A	0.0233582	0.0182849	0.0163704	0.00443048	0.0225816	0.0100713	0.0323077	0.00842817	0.0120009	0.00440342	0.0448164	0.0396186
TNFRSF13B	4.01185e-07	0.00245411	1.00523e-05	6.36957e-06	3.48493e-06	4.69338e-06	2.63245e-06	2.80819e-06	1.12808e-05	4.54408e-05	0.00252558	1.74808e-06
TNFRSF13C	0.000491539	6.66123e-06	1.15955e-05	2.4534e-06	8.82512e-06	3.3454e-06	0.000438944	6.10787e-06	1.44717e-05	2.96392e-05	2.47635e-05	3.95472e-07
TNFRSF14	0.00160105	0.000866204	0.0136267	0.00894028	0.00249703	0.00410004	0.00149558	0.00113766	0.0179304	0.0217702	0.00112474	0.00114638
TNFRSF17	0.000113556	3.87435e-05	7.56078e-05	4.94196e-05	9.68064e-05	0.00148244	0.000260379	0.000370053	0.00011791	9.9692e-05	0.00108957	0.00124642
TNFRSF18	5.0999e-06	8.19995e-06	1.98785e-05	9.94369e-06	1.21629e-05	1.18069e-05	1.00285e-05	1.70652e-05	5.0176e-06	4.56338e-06	0.000135018	0.000170527
TNFRSF19	0.0318719	6.01774e-05	0.0019319	0.000255688	0.000384571	0.000401031	0.00257648	0.00071321	0.0189506	0.000100119	1.13764e-06	0.00180726
TNFRSF21	0.0299416	0.0180021	0.0830359	0.0641159	0.0668242	0.0341073	0.289458	0.135607	0.0105073	0.012406	0.0293672	0.0339415
TNFRSF25	0.000202252	0.000117968	0.000338543	0.000133916	0.000272859	0.000321682	0.000304055	0.000323729	0.000141935	0.000132543	0.000114631	0.000104289
IL23R	3.0448	1.59155	4.2698	4.76263	2.27748	2.87006	1.88759	2.50837	2.52903	1.31338	2.63045	2.50747
